# Supplementary material for: Caffeic and Chlorogenic Acids Synergistically Activate Browning Program in Human Adipocytes: Implications of AMPK- and PPAR-Mediated Pathways
Source: Int J Mol Sci. 2020 Dec 21;21(24):9740. doi: 10.3390/ijms21249740 (PMC7766967; doi:10.3390/ijms21249740)
Supplement: Supplementary file 1 [file ijms-21-09740-s001.pdf]

## Supplementary material

### Caffeic and Chlorogenic Acids Synergistically Activate Browning Program in Human Adipocytes: Implications of AMPK and PPAR-mediated Pathways

Liliya V. Vasileva <sup>1</sup>, Martina S. Savova <sup>1,2</sup>, Kristiana M. Amirova <sup>1,2</sup>, Zhivka P. Balcheva-Sivenova <sup>1,2</sup>, Claudio Ferrante <sup>3</sup>, Giustino Orlando <sup>3</sup>, Martin Wabitsch <sup>4</sup> and Milen I. Georgiev <sup>1,2,\*</sup>

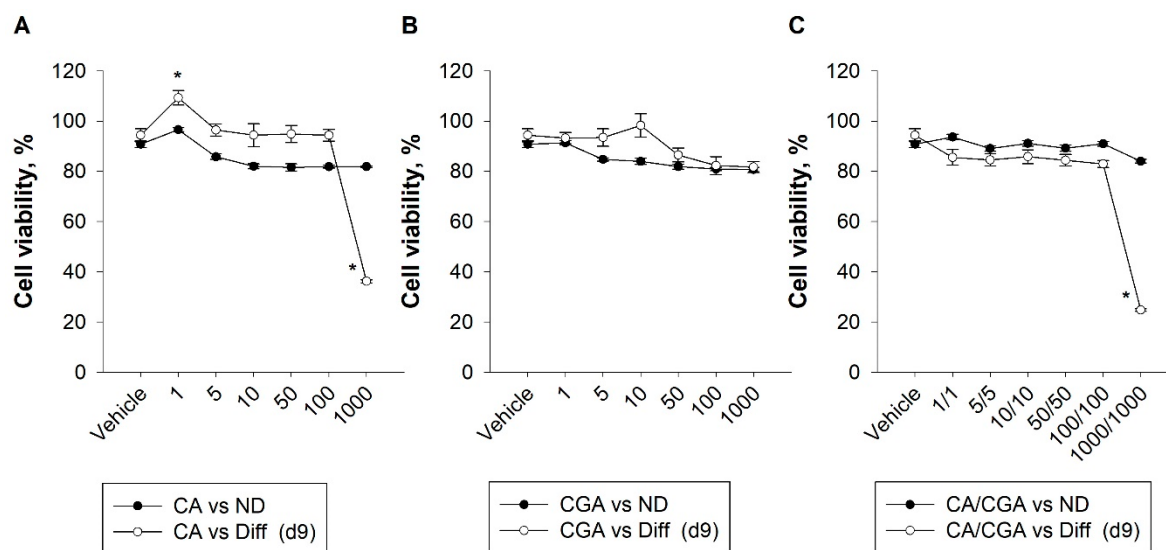

**Supplementary Figure S1.** Caffeic and chlorogenic acids effect on cell viability of SGBS cells. Caffeic acid (CA, **A**), chlorogenic acid (CGA, **B**) or CA/CGA combination (**C**) in concentrations up to 100  $\mu$ M do not influence cell viability of both SGBS preadipocytes (ND) and differentiating adipocytes on day 9 (Diff) on MTT assay. Shortly, SGBS cells (5000 cells/well/100  $\mu$ L in 96-well plates) were grown to near confluence for 48h or differentiated to adipocytes for eight days and treated with increasing concentrations from 1  $\mu$ M to 1000  $\mu$ M of CA, CGA, CA/CGA co-treatment or vehicle (0.02% DMSO). Twenty four hours post-treatment 5 mg/mL MTT solution was added (10  $\mu$ L/well) for 4 h followed by acquisition of the absorbance at 570 nm with reference filter 620 nm. Cell viability is presented in % of vehicle-treated controls mean  $\pm$  SEM and are representative from three independent experiments.

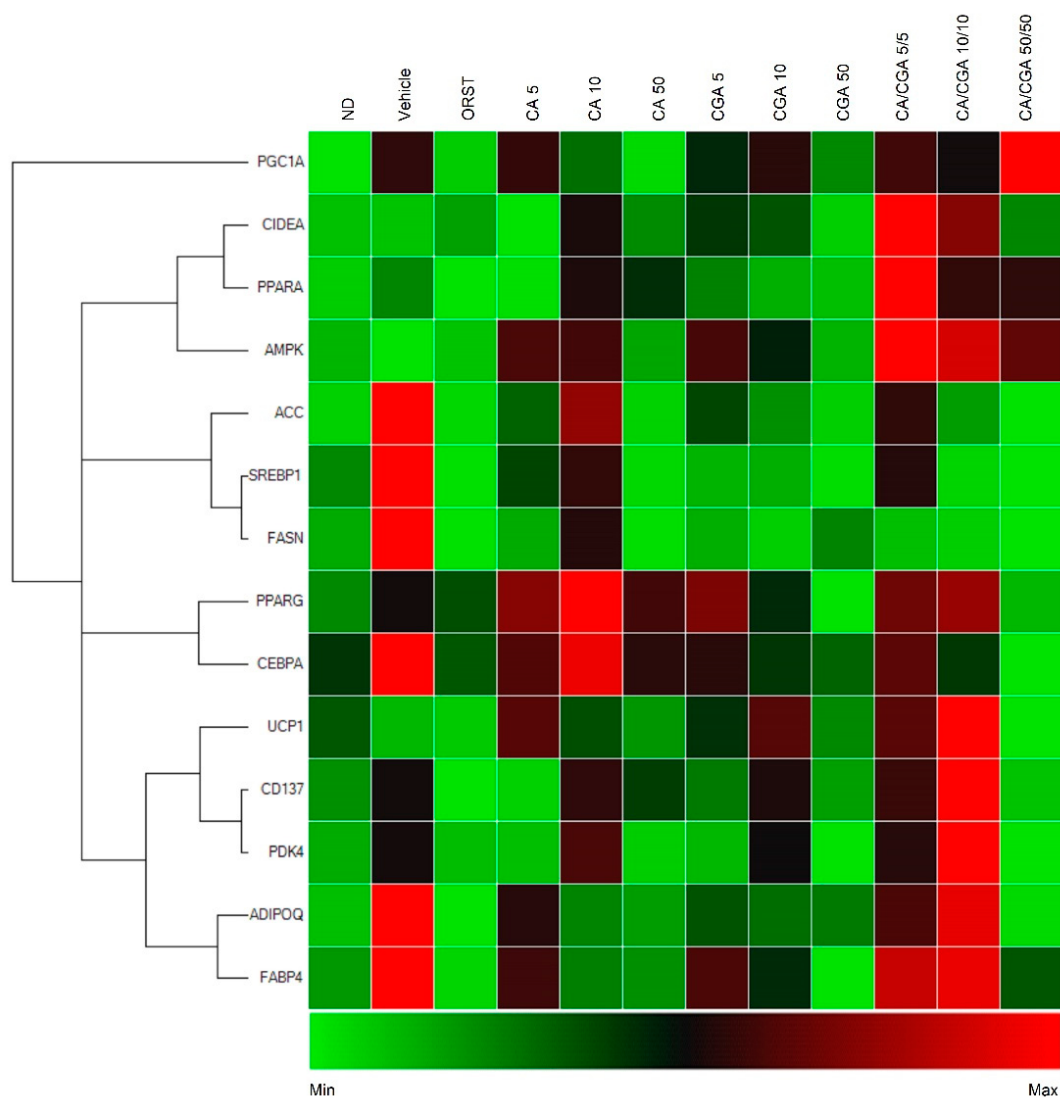

**Supplementary Figure S2.** Hierarchical cluster analysis and heatmap of the normalized relative expressions from the RT-qPCR. Caffeic and chlorogenic acids co-stimulation induced mRNA expression profile changes resembling browning in human white adipocytes. *RPL13A* and *TUBB* were used to normalize the data. Each sample was analysed in triplicates from three independent experiments. Data are presented in mean  $\pm$  SEM. \* $P < 0.05$  compared to vehicle control group.

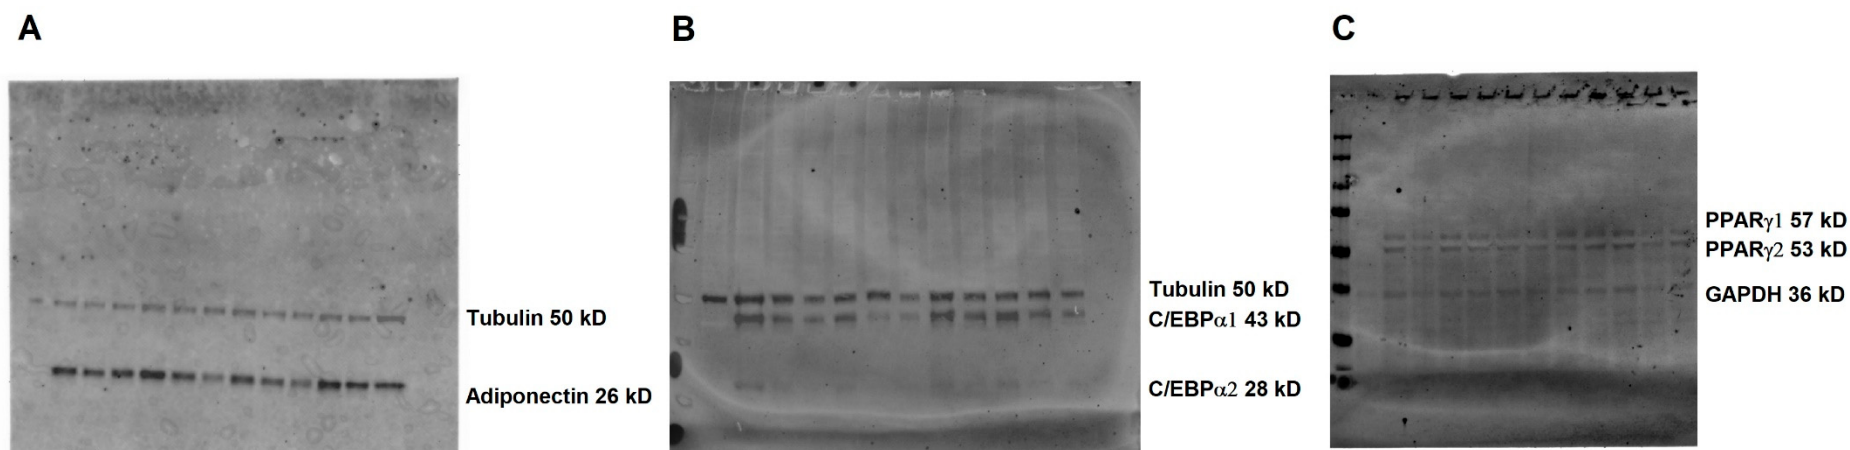

**Supplementary Figure S3.** Original images of the Western blot analysis from which Figure 5 was prepared. Protein expression levels of C/EBP $\alpha$  (**A**) and adiponectin (**B**) were normalized over tubulin as an internal control while PPAR $\gamma$  was normalized over GAPDH (**C**). Images were acquired on ChemiDoc MP (Bio-Rad) under multichannel mode with fluorescent detection. Lanes were loaded with 50  $\mu$ g total cell protein lysates as follows: non-differentiated SGBS; Vehicle-treated SGBS adipocytes; orlistat 5  $\mu$ M, CA 5  $\mu$ M, CA 10  $\mu$ M, CA 50  $\mu$ M, CGA 5  $\mu$ M, CGA 10  $\mu$ M, CGA 50  $\mu$ M, CA/CGA 5/5  $\mu$ M, CA/CGA 10/10  $\mu$ M, CA/CGA 50/50  $\mu$ M. These blots are representative from three independent experiments.

**Supplementary Table S1. Primer pairs designed for the RT-qPCR.**

| Target gene<br>(human) | Forward primer (5' - 3')  | Length | Reverse primer (5' - 3')  | Length | Tm f/r (°C) | Product length<br>(bp) |
|------------------------|---------------------------|--------|---------------------------|--------|-------------|------------------------|
| <i>ACC</i>             | TTCCTCCACCTTGTCAGCG       | 20     | GTCAGAGAAGCAGCCCATCA      | 20     | 60.25/59.75 | 99                     |
| <i>ADIPOQ</i>          | TGCCCAAAGAGGAGAGAGGAA     | 21     | TCAGAAACAGGCACACAACCTCA   | 22     | 60.49/60.36 | 97                     |
| <i>AMPK</i>            | GAAAGTCGGCGTCTGTTCCA      | 20     | CATGTGTGCATCAAGCAGGA      | 20     | 60,60/58.83 | 111                    |
| <i>CD137</i>           | AATGGGACGAAGGAGAGGGA      | 20     | AGAAACGGAGCGTGAGGAAG      | 20     | 59.96/60.04 | 187                    |
| <i>CEBPA</i>           | TATAGGCTGGGCTTCCCCTT      | 20     | CTAGGTCTCCCTCTCCCACC      | 20     | 60.03/60.11 | 148                    |
| <i>CIDEA</i>           | CAGCAAGACTCTGGATGCCC      | 20     | CAAGATCATGAAATGCGTGTTGTCT | 25     | 60.75/60.62 | 130                    |
| <i>FABP4</i>           | ACCTTAGATGGGGGTGTCCT      | 20     | TGCGAACTTCAGTCCAGGTC      | 20     | 59.58/59.97 | 177                    |
| <i>FASN</i>            | TCTACGGCTCCACGCTCTT       | 19     | GAAGAGTCTTCGTCAGCCAGG     | 21     | 60.68/60.40 | 130                    |
| <i>PDK4</i>            | CCTGTGAGACTCGCCAACAT      | 20     | GCTTTCTGGTCATCTGGGCT      | 20     | 60.04/60.03 | 152                    |
| <i>PGC1A</i>           | AAATATCTGACCACAAACGATGACC | 25     | GTTGGTTTGGCTTGTAAGTGTGT   | 24     | 59.65/60.62 | 134                    |
| <i>PPARA</i>           | CGGGATGCTGGTAGCGTATG      | 20     | GCCAGGACGATCTCCACAG       | 19     | 60.67/59.86 | 187                    |
| <i>PPARG</i>           | GATCCAGTGGTTGCAGATTACAA   | 23     | GAGGGAGTTGGAAGGCTCTTC     | 21     | 58.99/60.07 | 144                    |
| <i>RPL13A</i>          | AAAAGCGGATGGTGGTTCCT      | 20     | GCTGTCACTGCCTGGTACTT      | 20     | 59.89/59.96 | 118                    |
| <i>SREBP1</i>          | TGTACTTCTGGAGGCATCGC      | 20     | CTACAAGCCAGGTCCAGGTG      | 20     | 59.82/60.04 | 139                    |
| <i>TUBB</i>            | AGCCGTCTTACTCAACTGCC      | 20     | GTCACCCAGAATGGCAGAA       | 19     | 60.04/59.96 | 198                    |
| <i>UCPI</i>            | GAAACAGCACCTAGTTTAGGAAGC  | 24     | AGCCTTCGGTTGTTGCTATTATTCT | 25     | 59.85/60.86 | 187                    |

Abbreviations: bp, base pairs; Tm, melting temperature.
